# Supplementary material for: Cobalt oxide nanoparticles on TiO2nanorod/FTO as a photoanode with enhanced visible light sensitization
Source: Royal Society of Chemistry journal article supplement (doi:10.1039/c5ra23200g), 2016-01-01
Supplement: c5ra23200g1.pdf [file c5ra23200g1.pdf]

## Supporting Information

### Cobalt Oxide Nanoparticles on TiO<sub>2</sub> Nanorod/FTO as a Photoanode with Enhanced Visible Light Sensitization

Vivek Ramakrishnan,<sup>a</sup> Kim Hyun,<sup>a</sup> Jucheol Park,<sup>b</sup> and Beelyong Yang<sup>\*a</sup>

a) School of Advanced Materials and System Engineering, Kumoh National Institute of Technology, Gumi-si, Gyeongsangbuk-do, Republic of Korea.

b) Electronics & Information Technology Research Institute Gumi, 17 Chomdangjeop 1 St. Sandong, Gumi, Gyeongbuk, Republic of Korea.

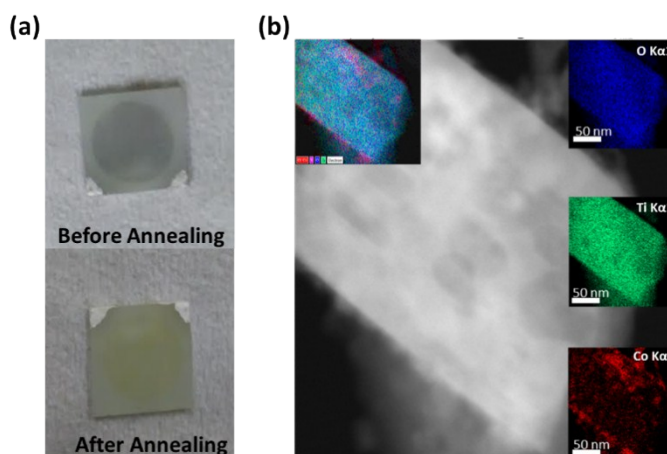

**Figure SI 1.** (a) Images of electrodeposited Cobalt oxide on hydrothermally grown TiO<sub>2</sub>/FTO by before and after annealing (b) EDS mapping of Cobalt oxide nanoparticle on TiO<sub>2</sub> nanorod/FTO

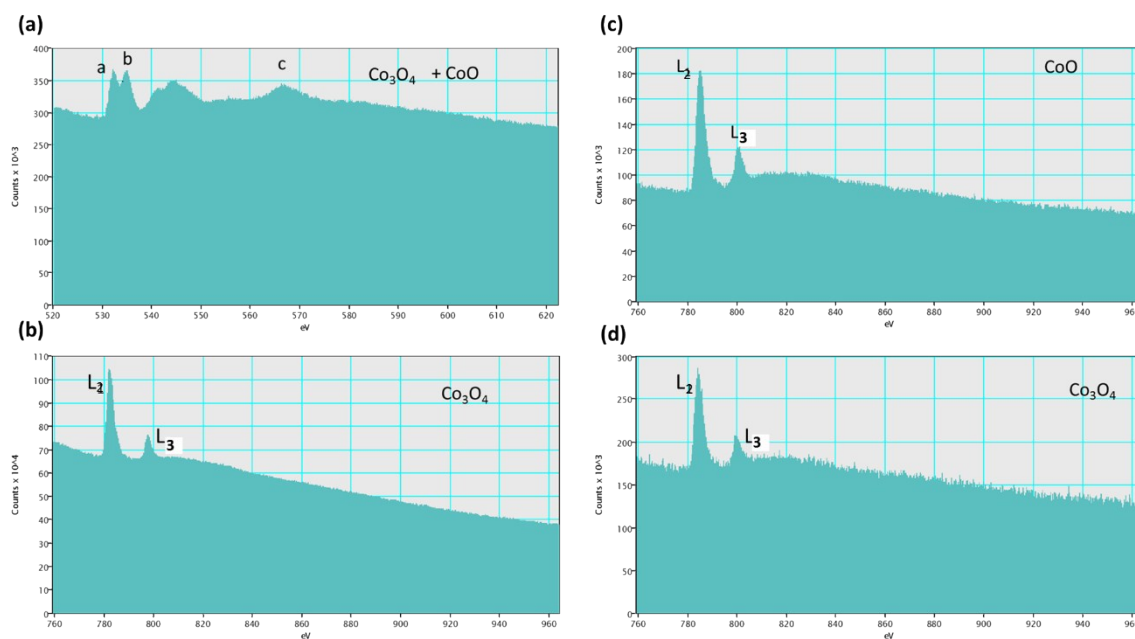

**Figure SI 2.** EELS spectrum of Cobalt oxide nanoparticle on TiO<sub>2</sub> nanorod/FTO annealed in air at (a), (b), (c) 500°C (d) 600°C

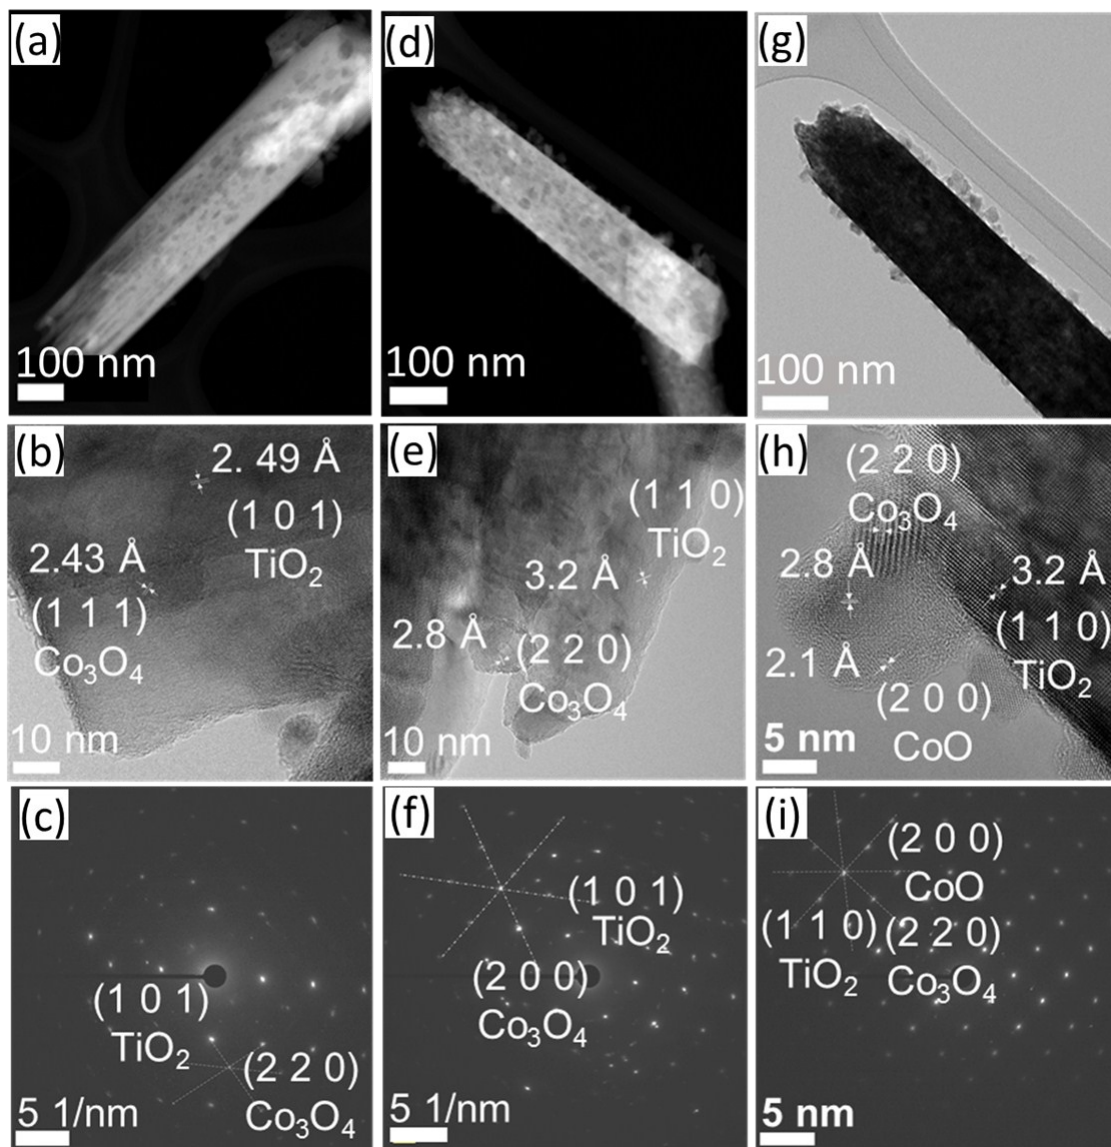

**Figure SI 3.** TEM image, Lattice-fringe, and SAED pattern of Cobalt oxides nanoparticles on TiO<sub>2</sub> nanorod with (a), (b), and (c) 20 seconds, (d), (e), and (f) 40 seconds and (g), (h), and (i) 60 seconds of electrodeposition time and annealing at 500°C in air.

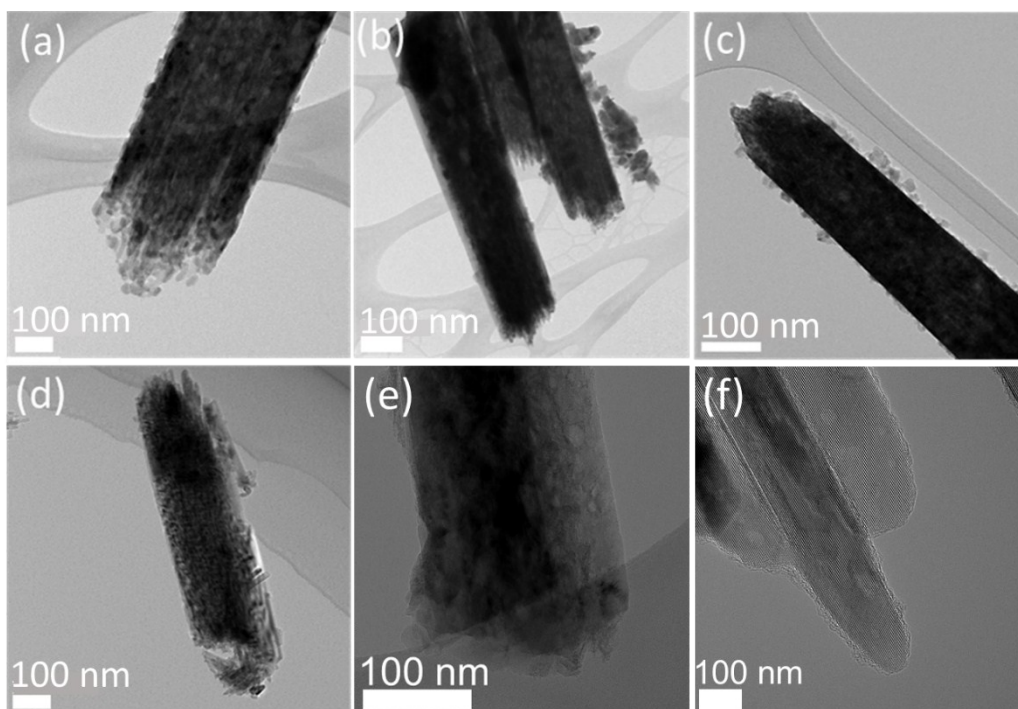

**Figure SI 4.** (a),(b), (c), (d), (e), and (f) TEM images of Cobalt oxides nanoparticles on  $\text{TiO}_2$  nanorod with annealing temperature of  $700^\circ\text{C}$ ,  $600^\circ\text{C}$ ,  $500^\circ\text{C}$ ,  $400^\circ\text{C}$ ,  $375^\circ\text{C}$  and  $350^\circ\text{C}$  respectively in air.

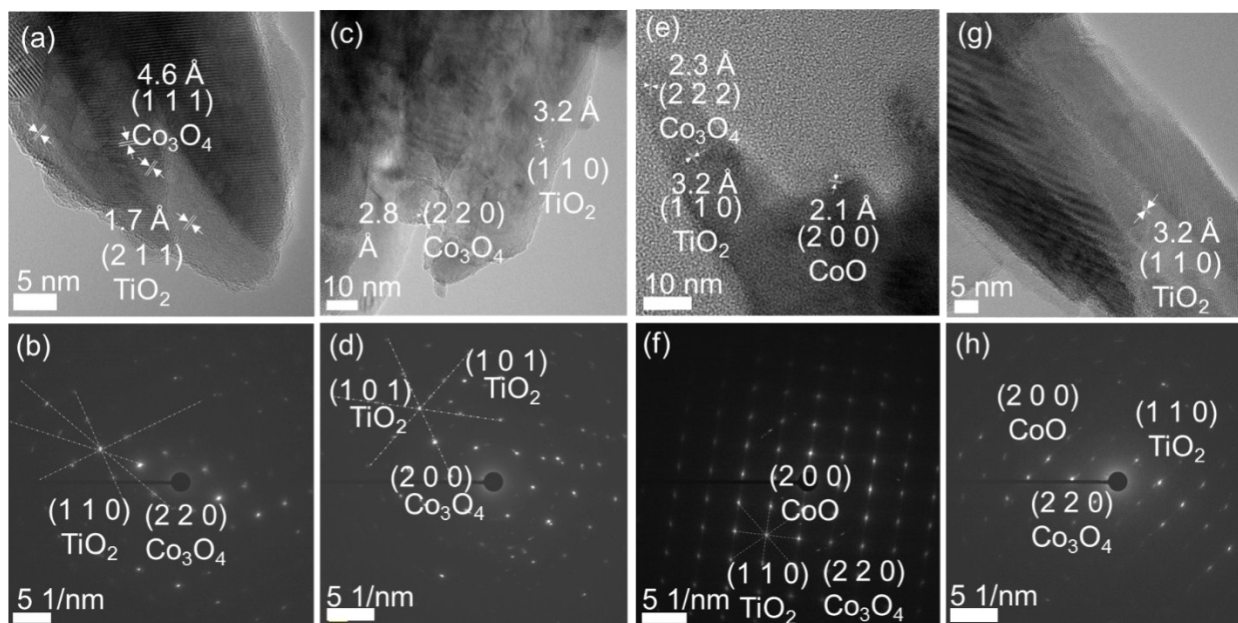

**Figure SI 5.** Lattice fringe TEM images and SAED patterns of Cobalt oxides nanoparticles on  $\text{TiO}_2$  nanorod with annealing temperature of  $600^\circ\text{C}$ ,  $500^\circ\text{C}$ ,  $400^\circ\text{C}$  and  $375^\circ\text{C}$  respectively in air.

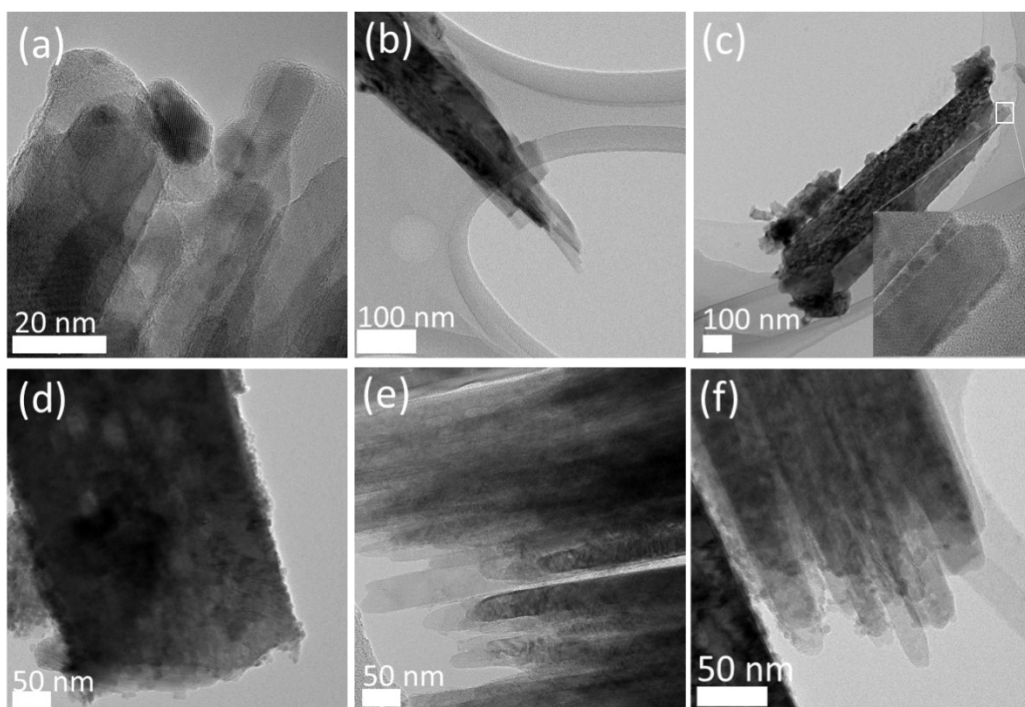

**Figure SI 6.** TEM images of Cobalt oxides nanoparticles on TiO<sub>2</sub> nanorod with annealing temperature of 700°C, 600°C, 500°C, 400°C, 375°C, and 350°C respectively in N<sub>2</sub>.

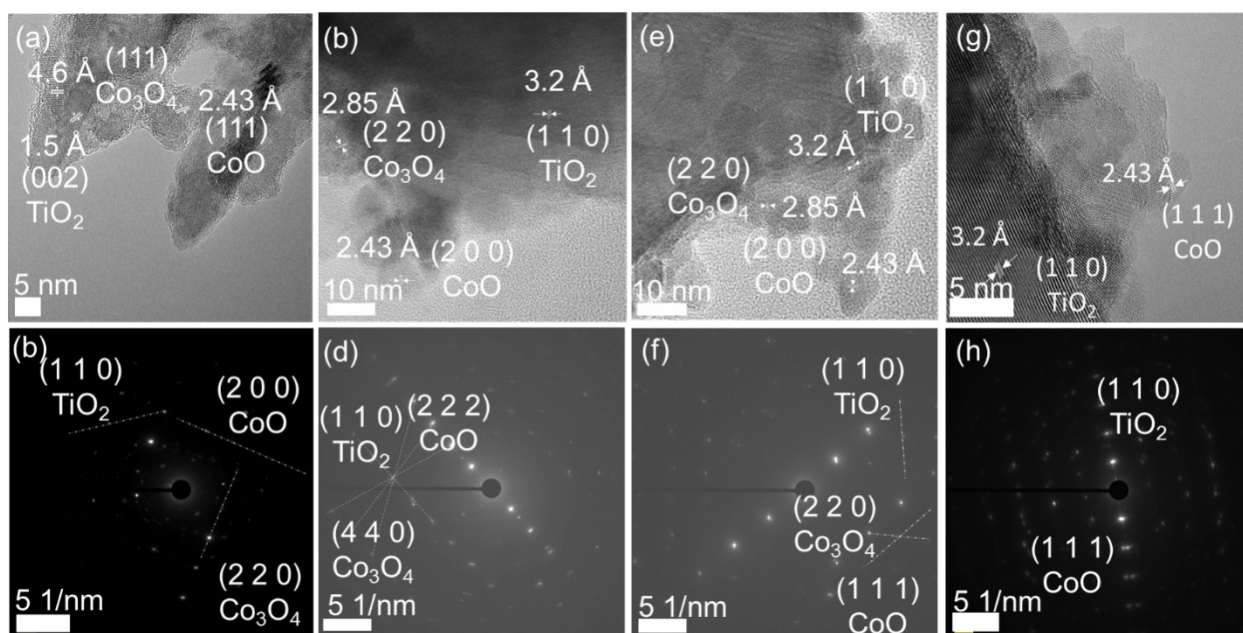

**Figure SI 7.** Lattice fringe TEM images and SAED pattern of Cobalt oxides nanoparticles on TiO<sub>2</sub> nanorod with annealing temperature of 600°C, 500°C, 400°C and 375°C respectively in N<sub>2</sub>.

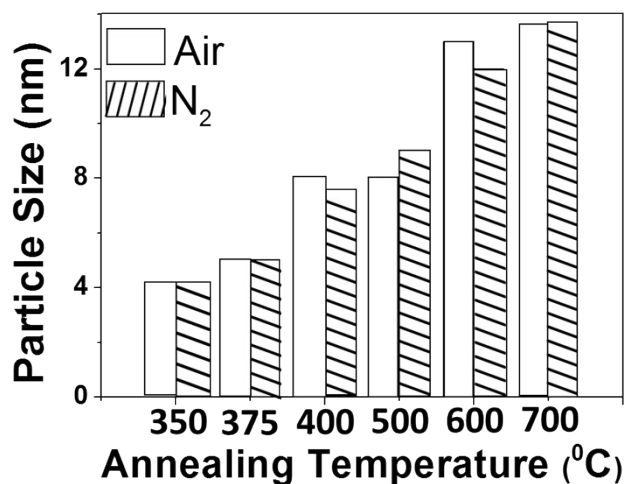

**Figure SI 8.** Relation between particle size with respect to electrodeposition time of Cobalt and its oxide formed on TiO<sub>2</sub> nanorods.

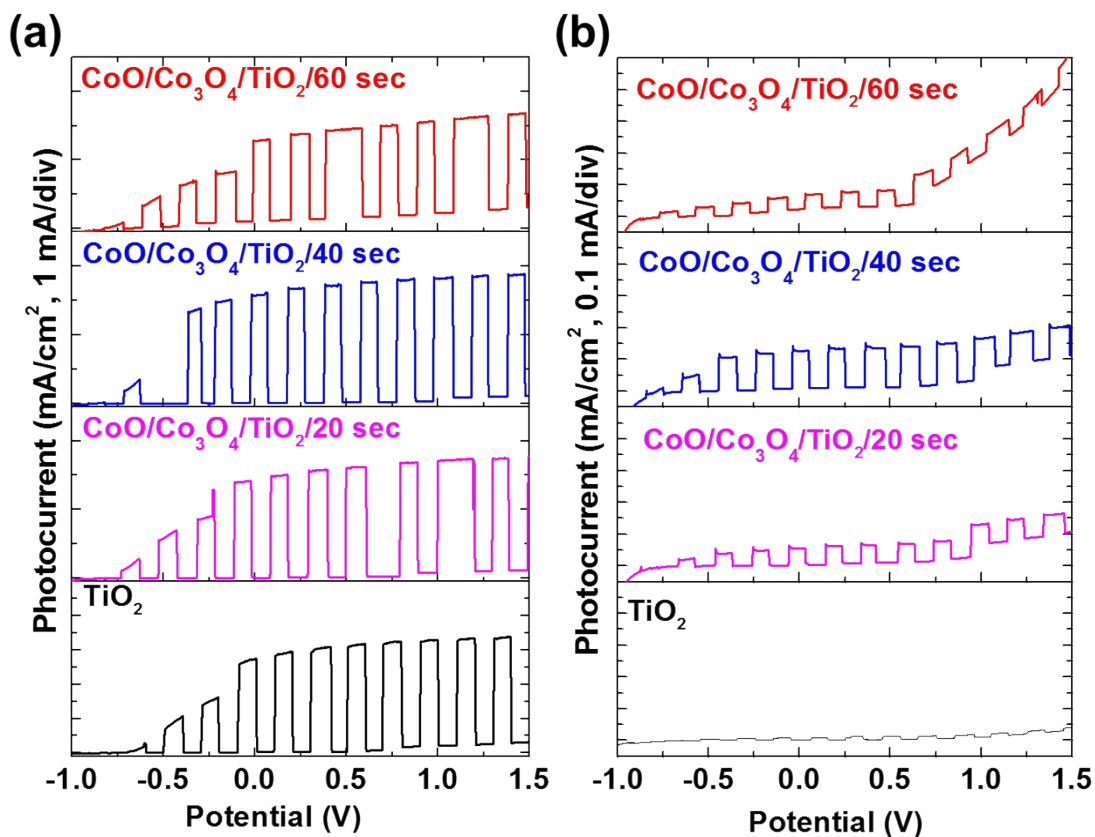

**Figure SI 9.** Comparison of photocurrent density-voltage diagram of Cobalt oxide/TiO<sub>2</sub> nano-structure and TiO<sub>2</sub> nanorod on FTO in 0.1 M Na<sub>2</sub>S aqueous solution with light intensity 100 mW/cm<sup>2</sup> annealed in air with various electrodeposition time of 20, 40, and 60 seconds (a) white light (b) visible light.

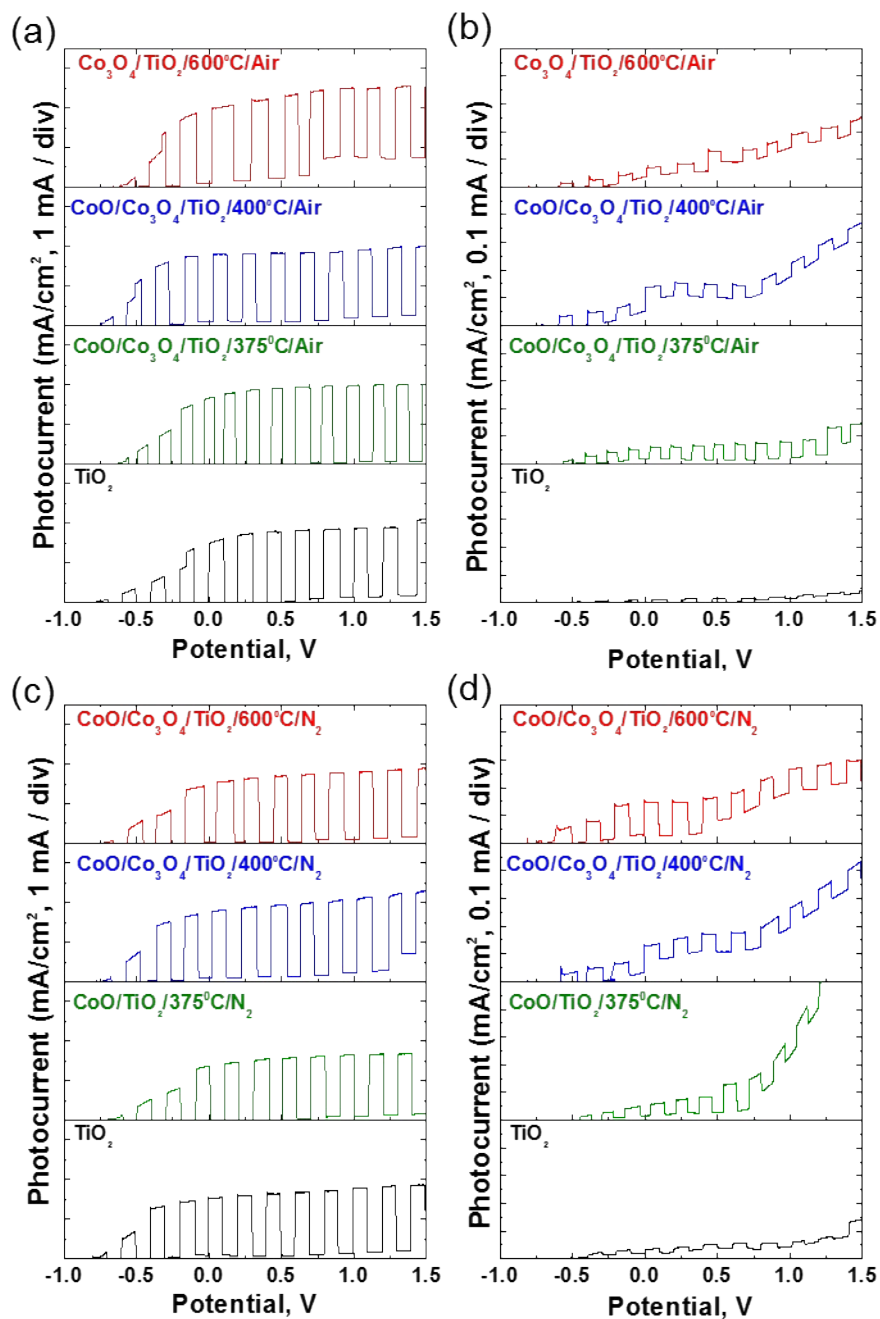

**Figure SI 10.** Comparison of photocurrent density-voltage diagram of Cobalt oxide/TiO<sub>2</sub> nanostructure and TiO<sub>2</sub> nanorod on FTO in 0.1 M Na<sub>2</sub>S aqueous solution with light intensity 100 mW/cm<sup>2</sup> annealed in air and nitrogen at 600°C, 400°C, and 350°C.

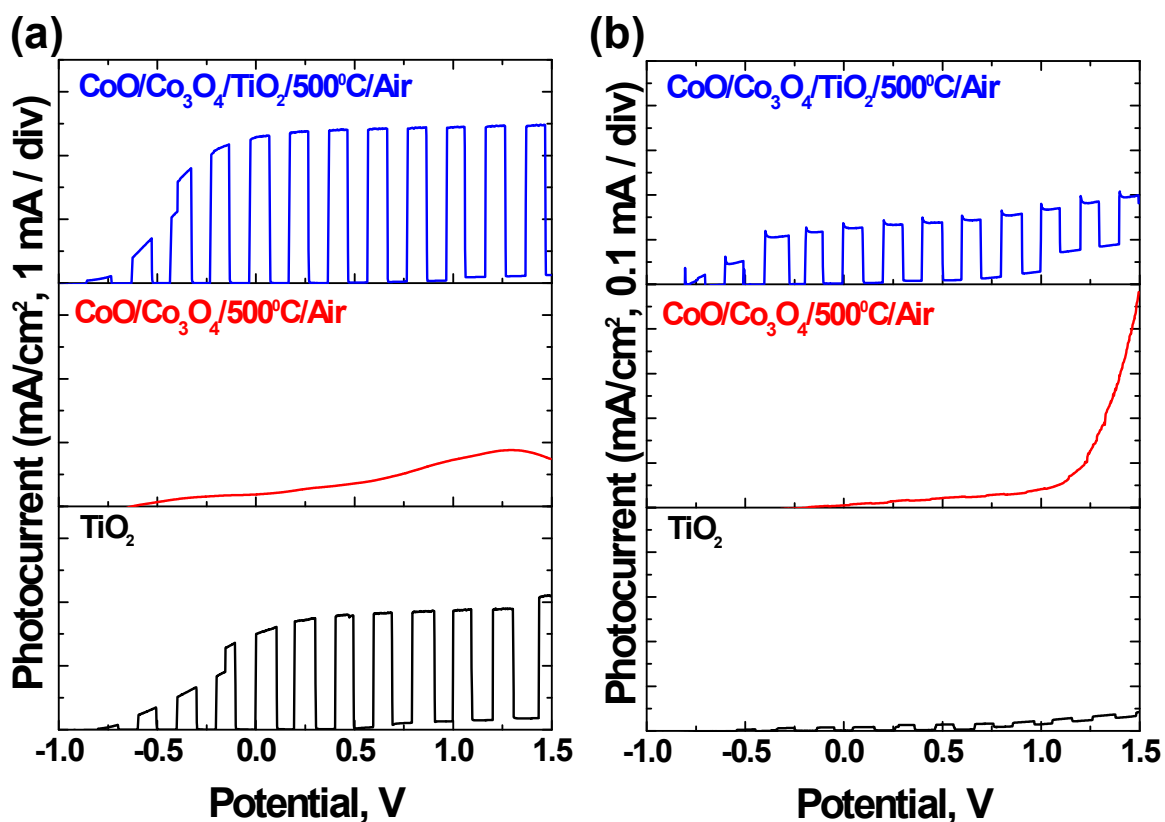

**Figure SI 11.** Comparison of photocurrent density-voltage diagram of Cobalt oxide/TiO<sub>2</sub> nanostructure to that of bare Cobalt oxide and TiO<sub>2</sub> nanorod on FTO in 0.1 M Na<sub>2</sub>S aqueous solution with light intensity 100 mW/cm<sup>2</sup> annealed in air at 500°C (a) white light (b) visible light.

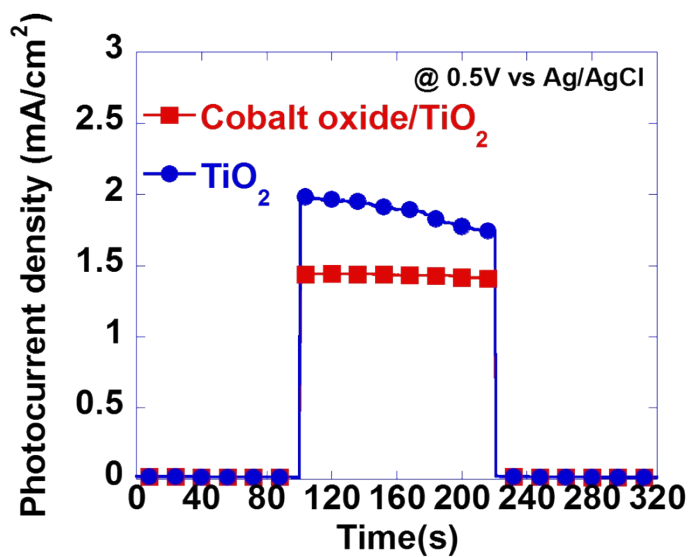

**Figure SI 12.** Photocurrent density kinetics of Cobalt oxide/TiO<sub>2</sub>/FTO and TiO<sub>2</sub>/FTO with biased ( $V_B = 0.5$  V vs Ag/AgCl) electrodes in 0.1 M Na<sub>2</sub>S (pH = 12.5) solution under white light irradiation (100 mW/cm<sup>2</sup>).
